# Supplementary material for: Region-Specific Integration of Embryonic Stem Cell-Derived Neuronal Precursors into a Pre-Existing Neuronal Circuit
Source: PubMed Central journal article supplement (PMC3688776; doi:10.1371/journal.pone.0066497), 2013-06-20

**Figure 4**

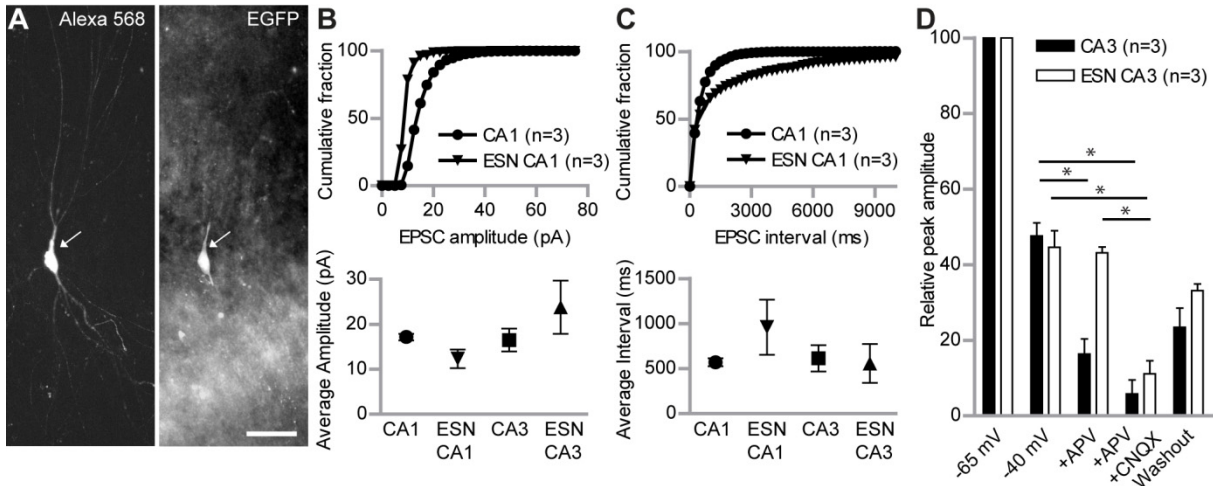

Supplement: pone.0066497.s004.pdf [file pone.0066497.s004.pdf]
